# Supplementary material for: Influence of Pain Killers on the Urinary Anabolic Steroid Profile
Source: Oxford University Press journal article supplement (doi:10.1093/jat/bkaa049), 2020-05-06
Supplement: bkaa049_supp.zip [file bkaa049_supp.zip]

Archive with 1 entries (1 files):
- jat-19-3035-File005.pdf
