# Supplementary material for: Influence of Pain Killers on the Urinary Anabolic Steroid Profile
Source: Oxford University Press journal article supplement (doi:10.1093/jat/bkaa049), 2020-05-06
Supplement: bkaa049_supp.zip [file bkaa049_supp.zip › jat-19-3035-File005.pdf]

# **Influence of Pain Killers on the Urinary Anabolic Steroid Profile**

## **Supplementary data**

Anna Stolla,<sup>a</sup> Michele Iannone<sup>b</sup>, Giuseppina De Gregorio<sup>b</sup>, Xavier de la Torre<sup>b</sup>, Francesco Molaioni<sup>b</sup>, Francesco Botrè<sup>b,c</sup>, and Maria Kristina Parr<sup>a,\*</sup>

<sup>a</sup>Freie Universitaet Berlin, Institute of Pharmacy, Pharmaceutical and Medicinal Chemistry (Pharmaceutical Analyses), Koenigin-Luise-Strasse 2+4, 14195 Berlin, Germany, anna.stoll@fu-berlin.de, maria.parr@fu-berlin.de

<sup>b</sup>Laboratorio Antidoping FMSI, Largo Giulio Onesti 1, Rome 00197, Italy, micheleiannone14@gmail.com, degregorio.giuseppina@gmail.com, xavier.delatorre@fmsi.it, molaioni@gmail.com, botref@gmail.com

<sup>c</sup>‘Sapienza’ University of Rome, Department of Experimental Medicine, Viale Regina Elena 324, Rome 00161, Italy, francesco.botre@uniroma1.it

\* Corresponding author.

Prof Dr Maria Kristina Parr

Freie Universitaet Berlin, Institute of Pharmacy, Pharmaceutical and Medicinal Chemistry

Koenigin-Luise-Strasse 2+4,

14195 Berlin, Germany

maria.parr@fu-berlin.de

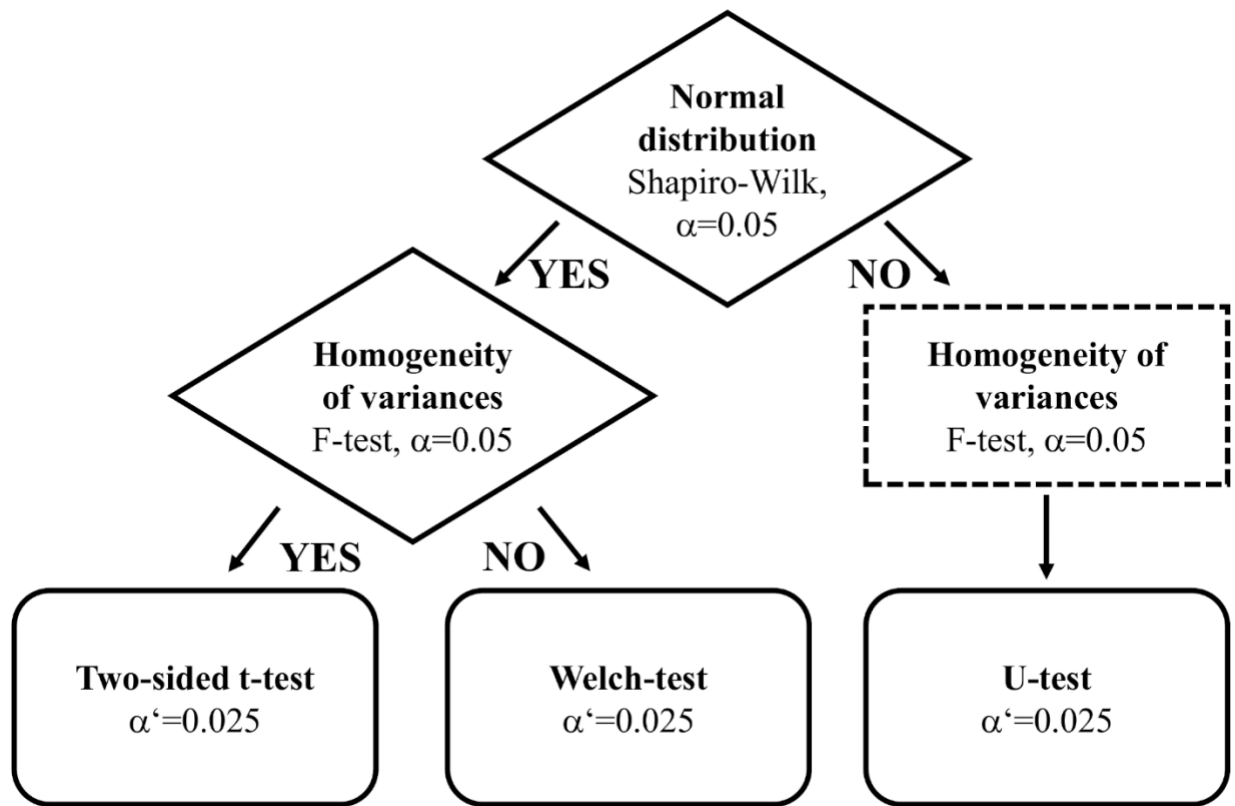

*Supplementary Figure 1. Decision tree for choice of significance test with lozenges indicating decisions, rectangles indicating processes on way to final result and rounded rectangles indicating final output generating processes; dashed lines indicating processes performed but not necessary for following step*

## **Determination of urinary concentrations of ibuprofen and its metabolites**

### *Experimental*

#### Materials

In addition to the materials mentioned in the main document, acetic acid from Honeywell Fluka, (Milan, Italy), sodium acetate from Sigma Aldrich (Milan, Italy), 2-hydroxy-ibuprofen, 2-carboxyibuprofen as reference substances and probenecid as internal standard (all from Sigma Aldrich, Milan, Italy) were used.

#### Urine sample preparation

Aliquots of 1 ml of urine, 50  $\mu$ l of internal standard (probenecid at 50 ng/ml), 30  $\mu$ l of  $\beta$ -glucuronidase and 500  $\mu$ l PBS 0.8 M were mixed and heated for 1 hour at 55 °C. After addition of 500  $\mu$ l sodium-acetate buffer pH 5 and 5 ml tert-butyl-methyl-ether (TBME), liquid-liquid extraction was performed. The organic phase was then treated like described in the main document.

### *Instrumental*

#### Measurement of ibuprofen and its metabolites in urine samples on GC–QQQ

The instrumental setting was the same as described for the analysis of steroids from urine samples. Aberrantly, for the analysis of ibuprofen and its metabolites the oven program was: 85°C initial temperature hold for 1 min, 15°C/min to 320°C. Transitions for analysed compounds are given in Supplementary Table 1. Selectivity, linearity, repeatability, recovery and limit of detection (LOD) were tested (data not shown).

## Results

Concentrations of ibuprofen and its main metabolites (2-hydroxyibuprofen and carboxyibuprofen) were determined in samples of the male volunteer. No ibuprofen or metabolites were detected in randomly selected samples before the application study or in samples collected after the administration period, while ibuprofen and both metabolites were detectable in at least one sample per day during the whole administration period (peak concentrations mostly in the urine collected at 1 pm, Supplementary Figure 2).

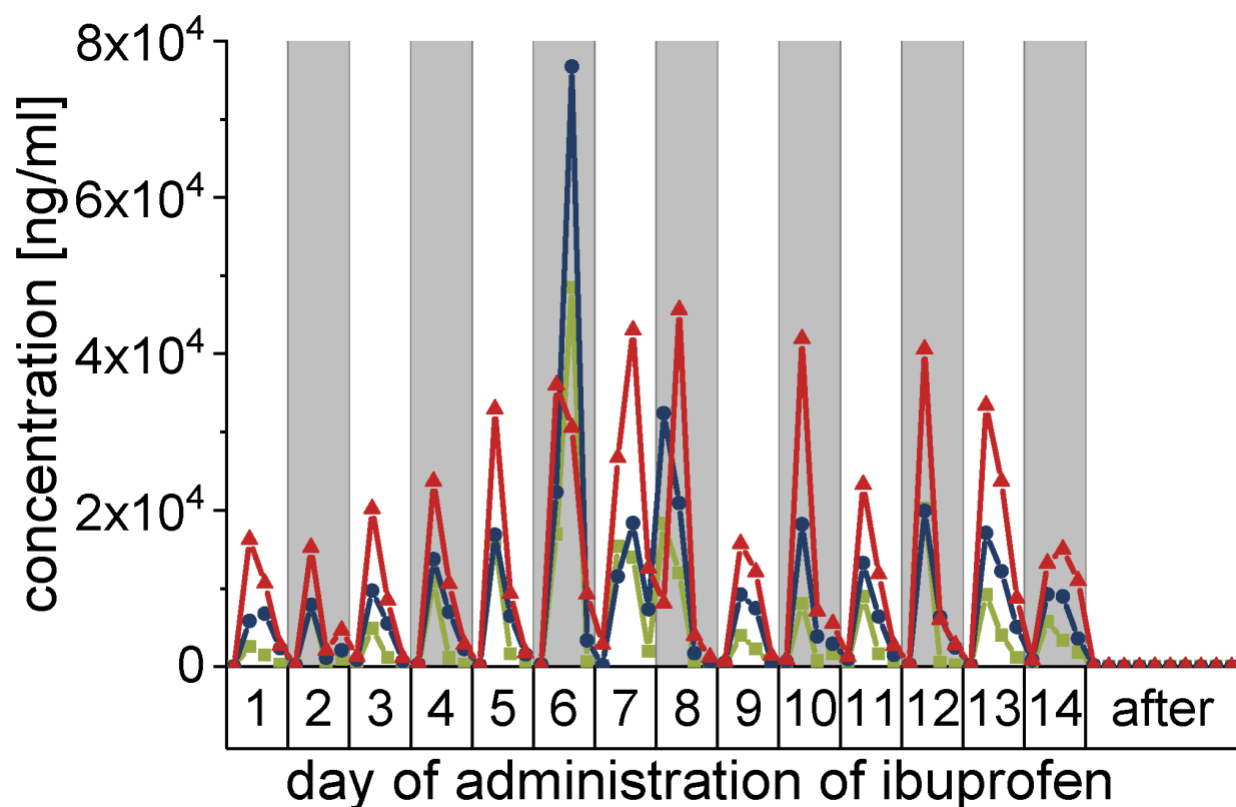

Supplementary Figure 2. Measured concentrations of ibuprofen and its metabolites in urine samples collected from male volunteer. Concentrations (corrected for specific gravity) of ibuprofen (green), 2-hydroxy-ibuprofen (blue) and carboxy-ibuprofen (red) are plotted for each sampling point

Supplementary Table 1: Transitions of Ibuprofen and its metabolites after derivatization

| Analytes                      | Precursor ion<br>[m/z] | Product ion<br>[m/z] | Collision energy<br>[eV] |
|-------------------------------|------------------------|----------------------|--------------------------|
| Ibuprofen mono-O-TMS          | 263                    | 191; 129; 193        | 30; 30; 30               |
| 2-Hydroxy-ibuprofen bis-O-TMS | 351; 261; 351          | 159; 206; 261        | 30; 30; 30               |
| Carboxy-ibuprofen bis-O-TMS   | 336; 365; 365          | 118; 173; 221        | 30; 30; 30               |

Supplementary Table 2: Transitions for the steroid profiling on the GC–MS–MS system

| Analytes (all as bis-O-TMS-derivatives)                            | Precursor ion<br>[m/z] | Product ion<br>[m/z] | Collision energy<br>[eV] |
|--------------------------------------------------------------------|------------------------|----------------------|--------------------------|
| Testosterone                                                       | 432                    | 209; 196             | 20; 30                   |
| Epitestosterone                                                    | 432                    | 209; 196             | 20; 10                   |
| Androsterone                                                       | 419; 434               | 329; 419             | 10; 10                   |
| Etiocholanolone                                                    | 419; 434               | 329; 419             | 10; 10                   |
| 5 $\alpha$ -Androstane-3 $\alpha$ ,17 $\beta$ -diol                | 256                    | 185; 198             | 10; 10                   |
| 5 $\beta$ -Androstane-3 $\alpha$ ,17 $\beta$ -diol                 | 241; 256               | 159; 199             | 20; 10                   |
| 5 $\alpha$ -Dihydrotestosterone                                    | 434                    | 405; 127             | 5; 20                    |
| Testosterone-d <sub>3</sub>                                        | 435                    | 209; 196             | 20; 30                   |
| Epitestosterone-d <sub>3</sub>                                     | 435                    | 209; 196             | 20; 30                   |
| Androsterone-glucuronide-d <sub>4</sub>                            | 423                    | 231; 333             | 20; 10                   |
| Etiocholanolone-d <sub>3</sub>                                     | 424                    | 221; 334             | 20; 10                   |
| 5 $\alpha$ -Androstane-3 $\alpha$ ,17 $\beta$ -diol-d <sub>3</sub> | 259                    | 188; 244             | 10; 5                    |
| 5 $\beta$ -Androstane-3 $\alpha$ ,17 $\beta$ -diol-d <sub>3</sub>  | 246; 261               | 164; 199             | 20; 10                   |
| 17 $\alpha$ -Methyltestosterone                                    | 301; 446               | 169; 301             | 20; 5                    |

Supplementary Table 3: P-values for significant differences at  $\alpha'=0.025$  for the male and female volunteer and the different steroids and ratios included in the steroid profile. 5 $\alpha$ -DHT and T/E is not reported, as no significant difference was observable. Groups classified as B/D: before compared to during administration of ibuprofen, D/A: during compared to post administration; Gray fields (-) indicate, that this test was not performed; red fields indicate no significant difference (n.s.); white fields indicate significant differences: orange writing and \*: significant difference at  $\alpha'=0.025$ , blue writing and \*\*: very significant difference at  $\alpha'=0.005$ , green writing and \*\*\*: highly significant difference at  $\alpha'=0.0005$

| Marker of steroid profile | Groups | Male volunteer                      |                                     | Female volunteer                   |                                    |
|---------------------------|--------|-------------------------------------|-------------------------------------|------------------------------------|------------------------------------|
|                           |        | t-Test                              | U-Test                              | t-Test                             | U-Test                             |
| T                         | B/D    | -                                   | n.s.                                | -                                  | <b>P = 0.0051 *</b>                |
|                           | D/A    | n.s.                                | n.s.                                | -                                  | <b>P = 0.0014 **</b>               |
| E                         | B/D    | -                                   | n.s.                                | -                                  | n.s.                               |
|                           | D/A    | -                                   | n.s.                                | -                                  | <b>P = 0.0083 *</b>                |
| AND                       | B/D    | -                                   | <b>P = 6.0*10<sup>-4</sup> **</b>   | -                                  | <b>P = 9.7*10<sup>-4</sup> **</b>  |
|                           | D/A    | -                                   | n.s.                                | -                                  | <b>P = 0.023 *</b>                 |
| ETIO                      | B/D    | -                                   | n.s.                                | -                                  | <b>P = 8.8*10<sup>-4</sup> **</b>  |
|                           | D/A    | n.s.                                | n.s.                                | -                                  | <b>P = 0.0023 **</b>               |
| ADIOL                     | B/D    | -                                   | n.s.                                | -                                  | <b>P = 5.6*10<sup>-5</sup> ***</b> |
|                           | D/A    | -                                   | n.s.                                | <b>P = 3.4*10<sup>-4</sup> ***</b> | <b>P = 8.3*10<sup>-5</sup> ***</b> |
| BDIOL                     | B/D    | -                                   | n.s.                                | -                                  | <b>P = 0.011 *</b>                 |
|                           | D/A    | -                                   | n.s.                                | -                                  | <b>P = 5.8*10<sup>-6</sup> ***</b> |
| 5 $\alpha$ DHT            | B/D    | n.s.                                | n.s.                                | -                                  | n.s.                               |
|                           | D/A    | n.s.                                | n.s.                                | -                                  | <b>P = 0.0020 **</b>               |
| AND/T                     | B/D    | <b>P = 7.2*10<sup>-8</sup> ***</b>  | <b>P = 6.2*10<sup>-7</sup> ***</b>  | -                                  | n.s.                               |
|                           | D/A    | n.s.                                | n.s.                                | -                                  | <b>P = 0.0015 **</b>               |
| AND/ETIO                  | B/D    | <b>P = 6.6*10<sup>-12</sup> ***</b> | <b>P = 8.5*10<sup>-11</sup> ***</b> | n.s.                               | n.s.                               |
|                           | D/A    | <b>P = 5.9*10<sup>-4</sup> **</b>   | <b>P = 1.8*10<sup>-4</sup> ***</b>  | <b>P = 7.5*10<sup>-5</sup> ***</b> | <b>P = 1.4*10<sup>-4</sup> ***</b> |
| ADIOL/BDIOL               | B/D    | -                                   | n.s.                                | <b>P = 0.024 *</b>                 | n.s.                               |
|                           | D/A    | -                                   | n.s.                                | -                                  | n.s.                               |

Supplementary Table 4: Type of assay and steady state kinetic parameters from literature compared to values obtained in this study for AKR1C2 catalyzed reduction of 5 $\alpha$ DHT

| source              | Assay                                                                                                                                                                                  | K <sub>m</sub> [ $\mu$ M] | k <sub>cat</sub>                  | V <sub>max</sub><br>[ $\mu$ mol/mL/min]            |
|---------------------|----------------------------------------------------------------------------------------------------------------------------------------------------------------------------------------|---------------------------|-----------------------------------|----------------------------------------------------|
| This study          | <b>Fluorescence-emission assay:</b> 0.28 $\mu$ M AKR1C2, 12 $\mu$ M NADPH, 3-100 $\mu$ M 5 $\alpha$ DHT (and 30 $\mu$ M Ibuprofen for values in lower line) in PBS 0.1 M, pH 7.4, 37°C | 13.4; SE=5.6              | 0.46 min <sup>-1</sup>            | 1.3*10 <sup>-4</sup><br>(SE=1.7*10 <sup>-5</sup> ) |
|                     |                                                                                                                                                                                        | 16.0; SE=3.1              | 0.18 min <sup>-1</sup>            | 5.1*10 <sup>-5</sup><br>(SE=3.3*10 <sup>-6</sup> ) |
|                     | <b>GC-QToF-analysis:</b> 0.28 $\mu$ M AKR1C2, 12 $\mu$ M NADPH, 3-100 $\mu$ M 5 $\alpha$ DHT (and 30 $\mu$ M Ibuprofen for values in lower line) in PBS 0.1 M, pH 7.4, 37°C            | 10.6; SE=5.9              | 1.70 min <sup>-1</sup>            | 4.8*10 <sup>-4</sup><br>(SE=1.4*10 <sup>-4</sup> ) |
|                     |                                                                                                                                                                                        | 10.7; SE=1.0              | 1.09 min <sup>-1</sup>            | 3.0*10 <sup>-4</sup><br>(SE=2.1*10 <sup>-5</sup> ) |
| Jin and Penning [1] | <b>Fluorescence-emission assay:</b> 0.17 $\mu$ M AKR1C2, 12 $\mu$ M NADPH, 1.5–25 $\mu$ M 5 $\alpha$ DHT in PBS 10 mM, pH 7, 25°C                                                      | 2.9 $\pm$ 0.2             | 0.033 $\pm$ 0.002 s <sup>-1</sup> | not indicated                                      |
| Penning et al [2]   | <b>Radiochemical assay:</b> 5 $\mu$ g AKR1C2, 2.3 mM NADPH, 3–50 $\mu$ M <sup>14</sup> C-5 $\alpha$ DHT in PBS 0.1 M, pH 7, 37°C                                                       | 26.0 $\pm$ 6.6            | 0.23 min <sup>-1</sup>            | 6.2 nmol/min/mg $\pm$ 0.8 nmol/min/mg              |
| Byrns et al [3]     | <b>Radiochemical assay:</b> AKR1C2, 200 $\mu$ M NADPH, 1.5–16.5 $\mu$ M <sup>14</sup> C-5 $\alpha$ DHT in PBS 100 $\mu$ M, pH 7                                                        | 4.6 $\pm$ 1.4             | 3.8 $\pm$ 0.3 min <sup>-1</sup>   |                                                    |

## References

- [1] Jin, Y. and Penning, T.M. (2006) Multiple steps determine the overall rate of the reduction of 5 $\alpha$ -dihydrotestosterone catalyzed by human type 3 3 $\alpha$ -hydroxysteroid dehydrogenase: implications for the elimination of androgens. *Biochemistry*, 45, 13054-13063.
- [2] Penning, T.M., Burczynski, M.E., Jez, J.M., Hung, C.-F., Lin, H.-K., Ma, H., et al. (2000) Human 3 $\alpha$ -hydroxysteroid dehydrogenase isoforms (AKR1C1–AKR1C4) of the aldo-keto reductase superfamily : functional plasticity and tissue distribution reveals roles in the inactivation and formation of male and female sex hormones. *Biochemical Journal*, 67–77.
- [3] Byrns, M.C., Steckelbroeck, S. and Penning, T.M. (2008) An indomethacin analogue, N-(4-chlorobenzoyl)-melatonin, is a selective inhibitor of aldo-keto reductase 1C3 (type 2 3 $\alpha$ -HSD, type 5 17 $\beta$ -HSD, and prostaglandin F synthase), a potential target for the treatment of hormone dependent and hormone independent malignancies. *Biochemical pharmacology*, 75, 484–493.
